# Supplementary material
Source: MDPI journal article supplement (https://www.mdpi.com/1424-8247/17/4/409)

## *Supplementary materials*

# **In Vivo Anti-Inflammatory and Antinociceptive Activities of Black Elder (*Sambucus nigra* L.) Fruit and Flower Extracts**

Daniela Seymenska, Desislava Teneva, Irina Nikolova, Niko Benbassat and Petko Denev

Figure S1. Photograph of surgically removed cotton pellets after treatment with saline (C), diclofenac (D), fruit (Fr) and flower (Fl) extracts of *S. nigra*.

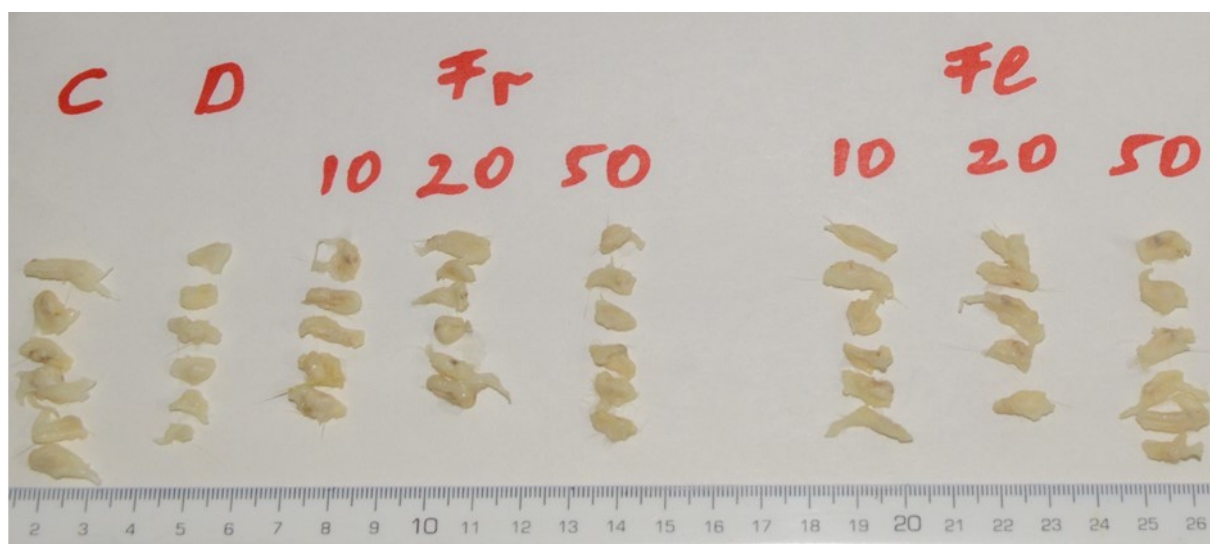

Supplement: s1 [file s1]
